# Supplementary material
Source: PubMed Central journal article supplement (PMC9156970)

Figure 5B

IB: Flag

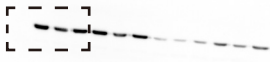

Figure 5B

IB: HA

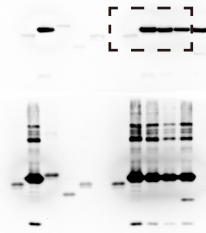

Figure 5B

IB: p-TBK1

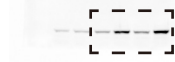

Figure 5B

IB: GAPDH

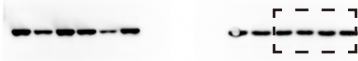

Figure 5B

IB: Myc

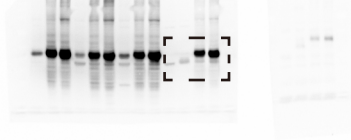

Figure 5F

IB: ZDHHC18

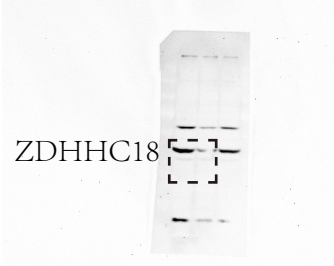

Figure 5F

IB: GAPDH

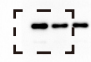

Figure 5J

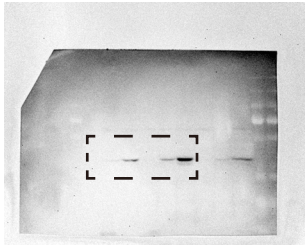

IB: p-STING

Figure 5J

IB: STING

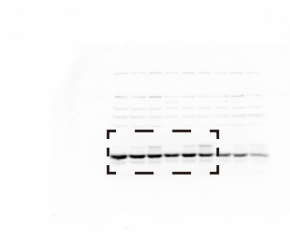

Figure 5J

IB: GAPDH

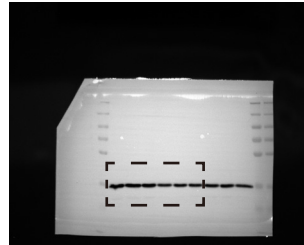

Supplement: EMBJ-41-e109272-s006.pdf [file EMBJ-41-e109272-s006.pdf]
