# Supplementary material
Source: PubMed Central journal article supplement (PMC9156970)
Supplement: EMBJ-41-e109272-s007.pdf [file EMBJ-41-e109272-s007.pdf]

**The PDF file includes:**

Figure S1. Palmitoylation of cGAS suppresses its activation.

Figure S2. ZDHHC18 is a major acyltransferase for cGAS palmitoylation.

Figure S3. Palmitoylation inhibits DNA binding to cGAS.

Figure S4. Palmitoylation dampens cGAS dimerization.

Figure S5. ZDHHC18 negatively regulates cGAS activation.

Figure S6. *Zdhhc18* deficiency promotes antiviral activity against DNA viruses in mice.

Table S1. Materials.

Table S2. Target sequences of shRNAs.

Table S3. Primers for Quantitative PCR.

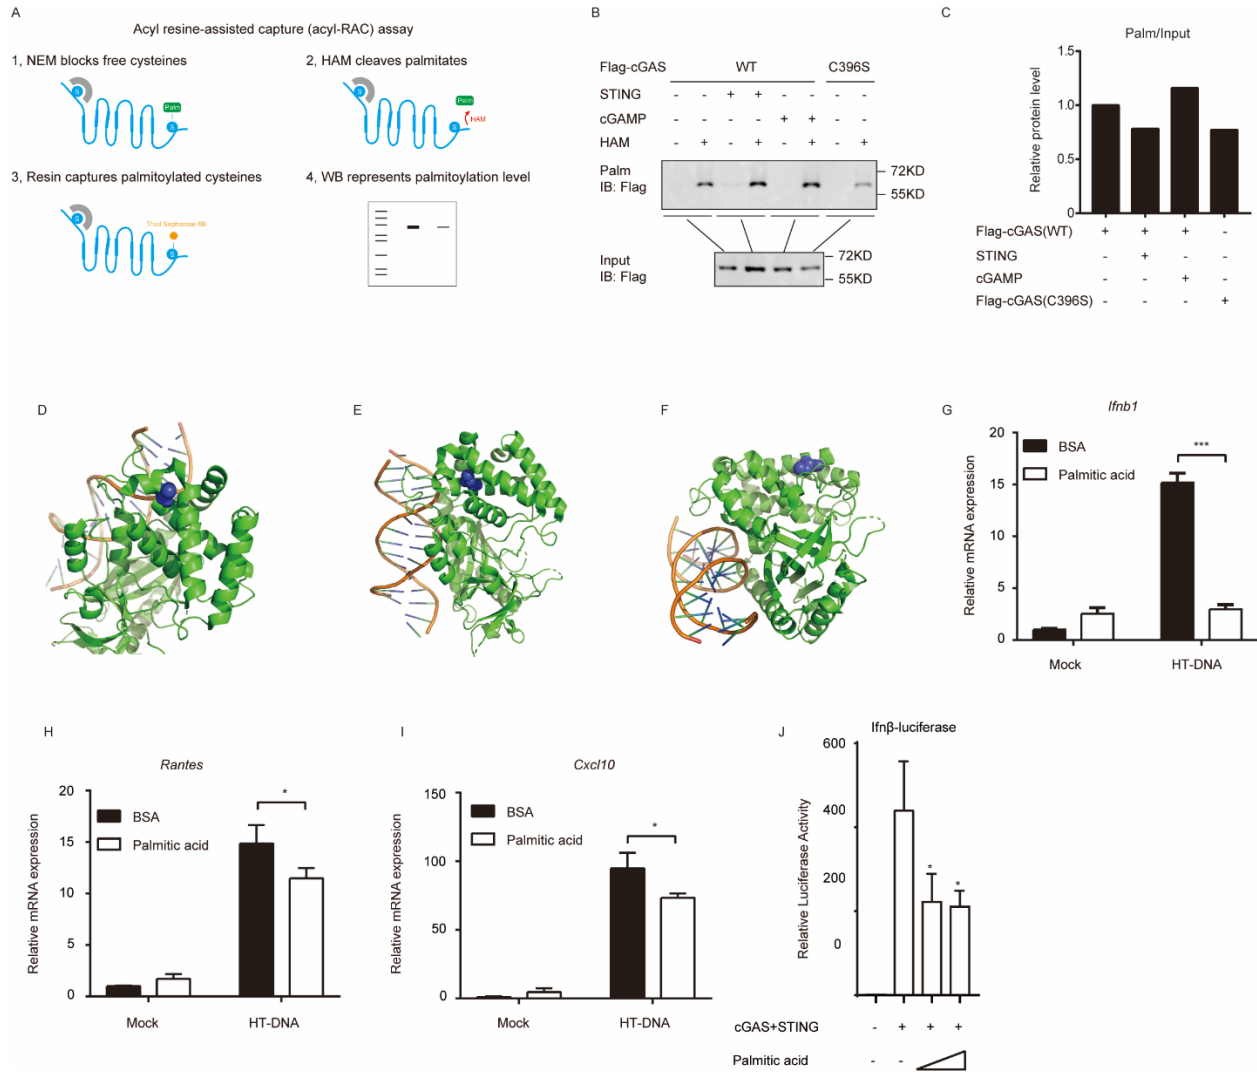

**Figure S1. Palmitoylation of cGAS suppresses its activation.**

(A) A schematic diagram showing the general process of the acyl resin-assisted capture (acyl-RAC) assay.

(B) Acyl-RAC assay of HEK293T cells transfected with Flag-cGAS and the indicated plasmids for 24 h or treated with cGAMP (1  $\mu$ g/ml) for 1 h.

(C) Quantification of palmitoylation levels of Flag-cGAS in (B)

(D to F) The positions of C405(D), C409(E) and C474(F) in the human cGAS-DNA complex. The blue sphere indicates cysteines and the yellow helix indicates DNA.

**(G-I)** L929 cells were treated with palmitic acid (0, 100  $\mu$ M, or 200  $\mu$ M) for 12 h and transfected with HT-DNA (2  $\mu$ g/mL) for 6 h before RT-qPCR analysis of Ifnb1 (G), Rantes (H) and Cxcl10 (I) expression. HT-DNA: herring testis DNA. BSA: Bovine serum albumin.

**(J)** HEK293T cells ( $5 \times 10^5$ ) were transfected with HA-cGAS (200 ng) and Flag-STING (200 ng) expression plasmids and treated with palmitic acid (0, 50  $\mu$ M, or 100  $\mu$ M) for 12 h before luciferase reporter assays were conducted.

Data information: Data are representative of at least two independent experiments; mean  $\pm$  SEM from triplicates of technical replicates, unpaired t test; \*,  $P < 0.01$ . \*\*\*,  $P < 0.001$ .

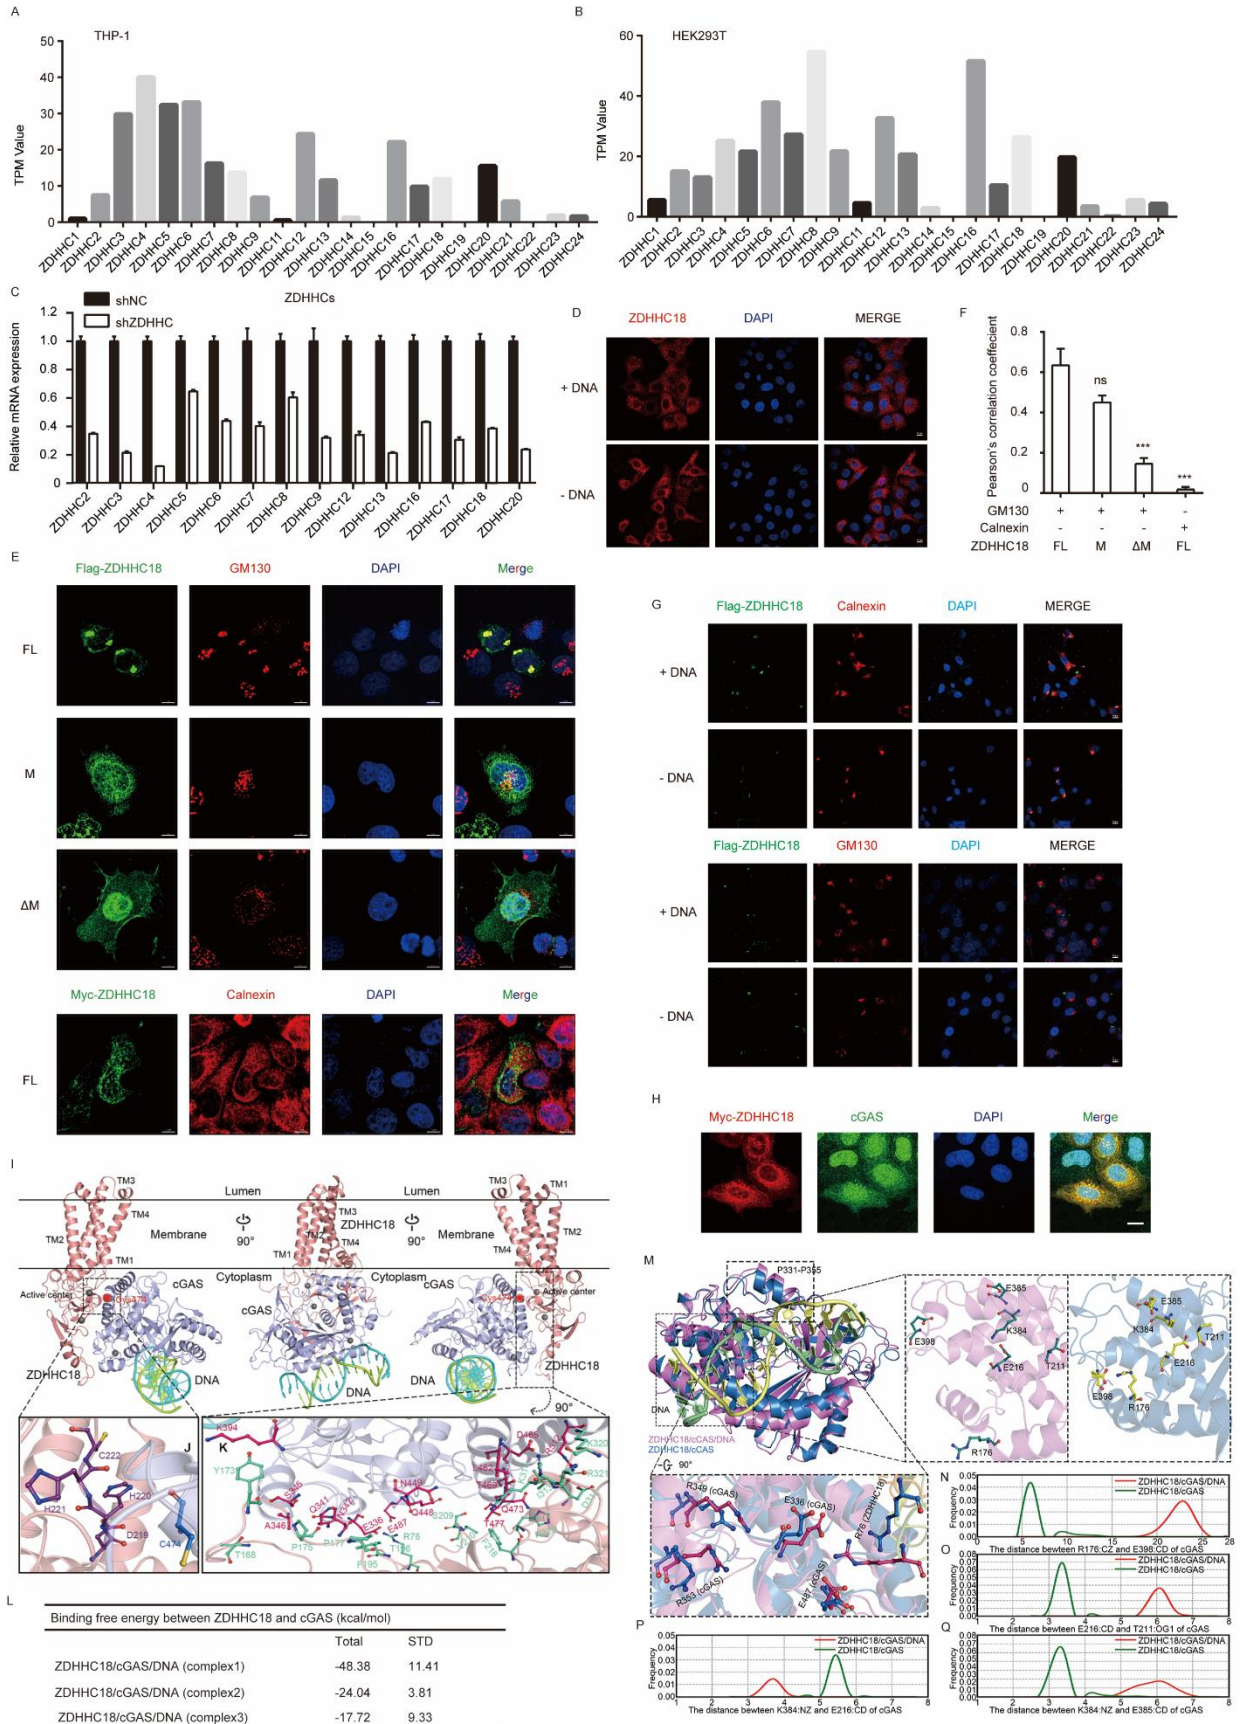

**Figure S2. ZDHHC18 is a major acyltransferase for cGAS palmitoylation.**

(A and B) Expression level of ZDHHCs in THP-1 cells (A) and HEK293T cells (B) according to The Human Protein Atlas (<https://www.proteinatlas.org/>). TPM: transcripts per million.

(C) The knockdown efficiency of individual ZDHHCs in HEK293T cells analyzed by RT-qPCR.

(D) Immunofluorescence analysis of endogenous ZDHHC18 in HeLa cells. Scale bars: 10  $\mu\text{m}$ .

(E) Immunofluorescence analysis of Flag-ZDHHC18 (FL or truncated mutants) and GM130 or calnexin in HeLa cells. FL: full length. Scale bars: 7  $\mu\text{m}$ .

(F) Colocalization (Pearson's correlation coefficient) of ZDHHC18 (FL or truncated mutants) and GM130 or calnexin in (E).

(G) Immunofluorescence analysis of stably overexpressed Flag-ZDHHC18 and GM130 or calnexin in HeLa cells with HT-DNA stimulation (or not). Scale bars: 10  $\mu\text{m}$ .

(H) Immunofluorescence analysis of Myc-ZDHHC18 and endogenous cGAS in HeLa cells. Scale bars: 7  $\mu\text{m}$ .

(I) Overall structure of the human ZDHHC18/cGAS/DNA complex. Cartoon representation of human ZDHHC18/cGAS/DNA complex. The ZDHHC18 is shown in salmon and the cGAS is highlighted with light blue, while two chains of DNA are limon and green, respectively. The three spheres represent the  $\text{Zn}^{2+}$  ions.

(J) Close-up of the ZDHHC18 active sites in (I). The ZDHHC motif is shown in firebrick sticks which surrounds C474 (skyblue stick) of cGAS.

(K) Close-up of the interaction face between ZDHHC18 and cGAS in (I). The key residues involved in the interaction are highlighted with pink sticks (cGAS) and limegreen sticks (ZDHHC18).

(L) Comparison of the binding free energy between ZDHHC18/cGAS/DNA complexes.

(M) Comparison of the structure of cGAS in different complexes. The cGAS proteins in ZDHHC18/cGAS/DNA and ZDHHC18/cGAS complexes are shown with pink cartoon and marine cartoon respectively.

(N-Q) Distribution frequency of the distance between R176:CZ and E398:CD (N), between E216:CD and T211:OG (O), between K384:NZ and E216:CD (P) and between K384:NZ and E385:CD (Q) in different complexes during the simulation in (M).

Data information: Data are representative of at least two independent experiments; mean  $\pm$  SEM from triplicates of technical replicates, unpaired t test; ns, not significant; \*\*\*,  $P < 0.001$ .

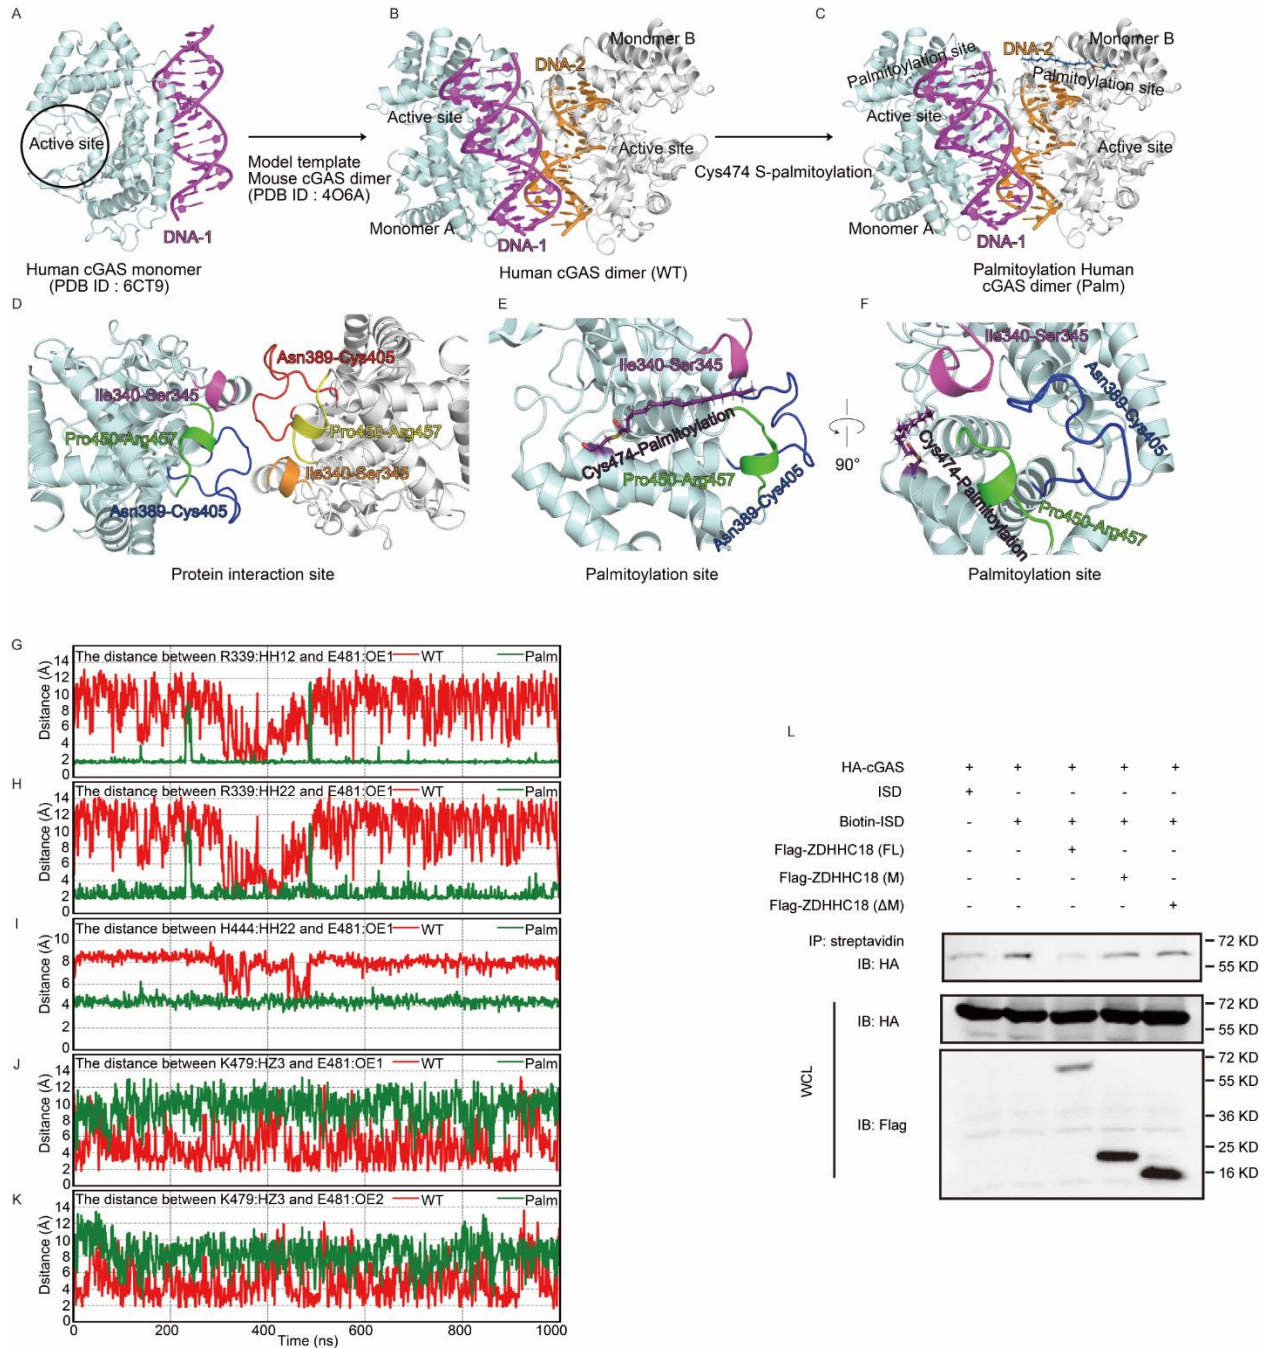

**Figure S3. Palmitoylation inhibits DNA binding to cGAS.**

**(A)** Structure of the functionally active human cGAS-DNA 1:1 complex (PDB ID: 6CT9).

**(B)** The human cGAS-DNA 2:2 complex was constructed by SWISS MODEL based on the mouse cGAS-DNA 2:2 complex (PDB ID: 4O6A). Monomer A and monomer B in the dimer are displayed as cartoons and colored pale cyan and white, respectively. DNA-1 and DNA-2 are colored magenta and orange, respectively.

**(C)** Human cGAS-DNA 2:2 complex in the palmitoylation state. The S-palmitoylated C474 residues in monomer A and monomer B are shown as sticks and colored fire brick and deep teal, respectively.

**(D)** The interaction locations of monomer A and monomer B. I340-S345, N389-C405 and P450-R457 are the key residues involved in the interaction between monomer A and monomer B.

**(E and F)** The location of the S-palmitoylation C474 site in monomer A.

**(G-K)** Evolution of the distance between R339:HH12 and E481:OE1 (G), R339:HH22 and E481:OE1, (H), H444:HH22 and E481:OE1 (I), K479:HZ3 and E481:OE1 (J), and K479:HZ3 and E481:OE2 (K) of the WT and palmitoylated cGAS proteins over time.

**(L)** HEK293T cells ( $1 \times 10^6$ ) were transfected with HA-cGAS and Flag-ZDHHC18 (FL or truncated mutants) expression plasmids. Biotin-conjugated ISD was transfected into cells 6 h before harvesting. Lysates were coprecipitated with streptavidin beads and then assessed by immunoblot analysis as shown.

Data information: FL: full length; WCL: whole cell lysate; IP: immunoprecipitation.



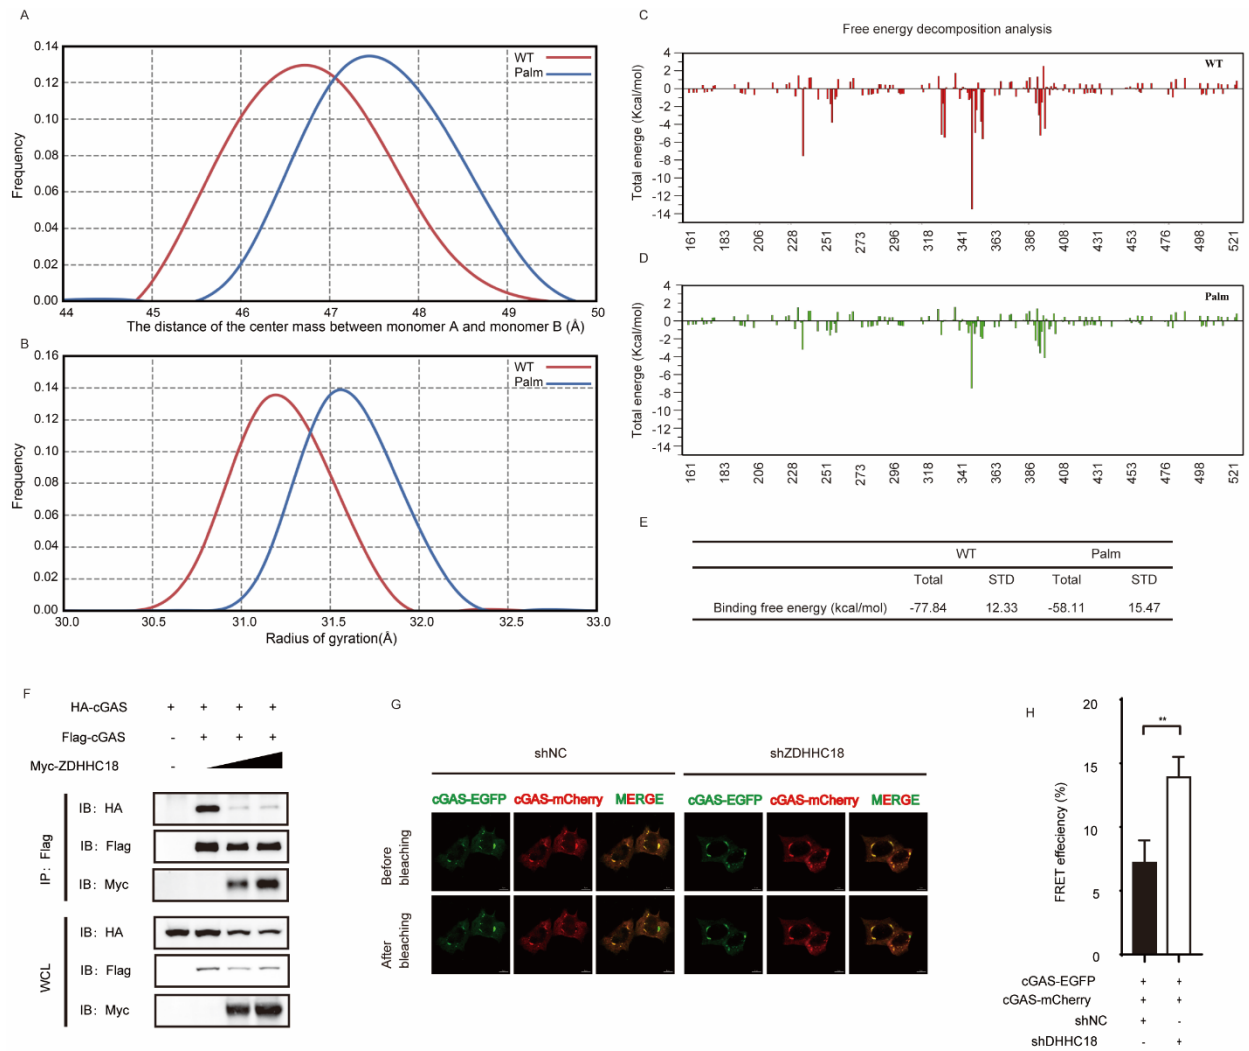

**Figure S4. Palmitoylation dampens cGAS dimerization.**

**(A)** Distribution frequency of the distance between the center masses of monomer A and monomer B in the human cGAS-DNA 2:2 complex in the resting and palmitoylation states during the simulation.

**(B)** Distribution frequency of the radius of gyration (Rg) of the human cGAS-DNA 2:2 complex in the resting and palmitoylation states during the simulation.

**(C and D)** Comparison of the per-residue binding energy decomposition to the binding affinity between complex I and complex II in the human cGAS-DNA 2:2 complex in the resting (C) and palmitoylation (D) states.

**(E)** The MM-GBSA results for the human cGAS-DNA 2:2 complex in the resting and palmitoylation states.

**(F)** Immunoprecipitation (with an anti-Flag antibody) and immunoblot analysis of HEK293T cells transfected with plasmids encoding Flag-cGAS (2  $\mu$ g), HA-cGAS (2  $\mu$ g), and Myc-ZDHHC18 (0, 1, or 2  $\mu$ g) for 24 h. WCL: whole cell lysate; IP: immunoprecipitation.

**(G)** FRET assay of HeLa cells transfected with cGAS-EGFP and cGAS-mCherry expression plasmids for 24 h after transfection with the indicated shRNA. Scale bar: 8  $\mu$ m.

**(H)** FRET efficiency of cGAS-GFP and cGAS-mCherry in (G).

Data information: Data are representative of at least two independent experiments; mean  $\pm$  SEM from triplicates of technical replicates, unpaired t test; nc: negative control; \*\*,  $P < 0.005$ .

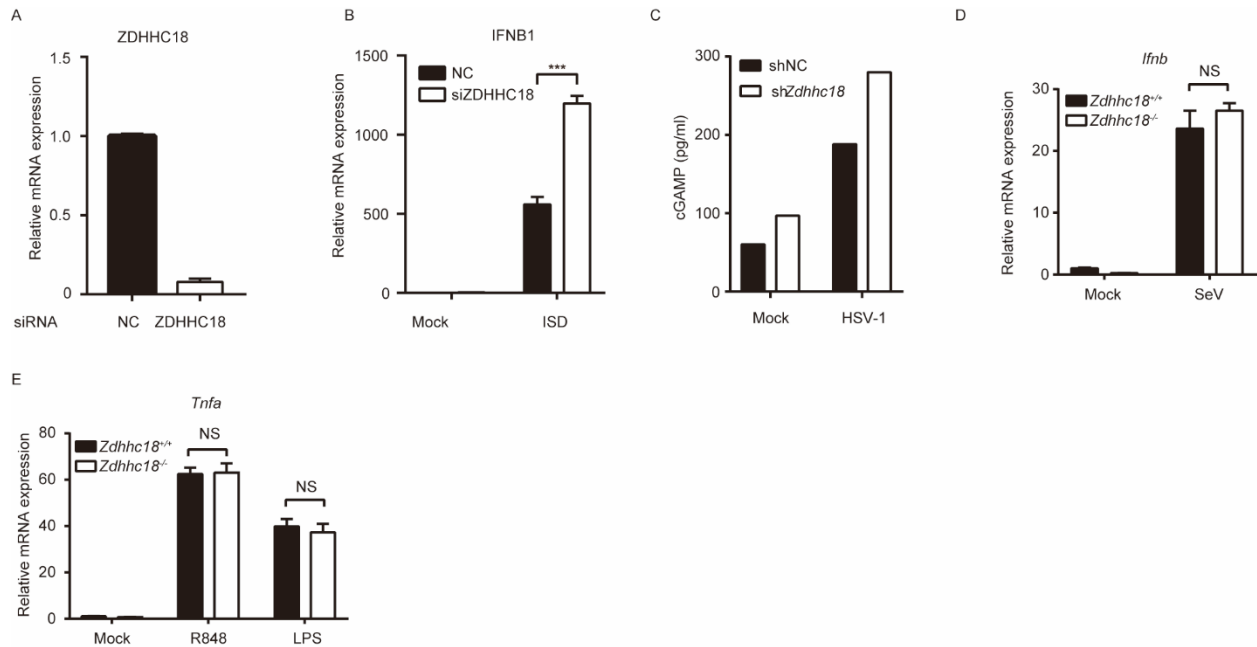

**Figure S5. ZDHHC18 negatively regulates cGAS activation.**

(A and B) THP-1 cells were transfected with scrambled siRNA or ZDHHC18 siRNA (cocktail) for 48 h and then transfected with HT-DNA (2  $\mu$ g/mL) for the indicated times before RT-qPCR analysis of IFNB1 expression. The knockdown efficiency of ZDHHC18 is shown in A. ISD: IFN-stimulatory DNA.

(C) ZDHHC18 stably knockdown L929 cells were infected with HSV-1 (MOI:5). After six hours, the cGAMP concentration was tested using LC-MS/MS.

(D-E) MEFs (*Zdhhc18*<sup>+/+</sup> or *Zdhhc18*<sup>-/-</sup>) were infected with SeV (1:500) (D) or R848 (100 ng/ml) and LPS (100 ng/ml) (E). After six hours, the expression of interferon alpha and TNF beta were analyzed by RT-qPCR.

Data information: Data are representative of at least two independent experiments; mean  $\pm$  SEM from triplicates of technical replicates, unpaired t test; nc: negative control; \*\*\*,  $P < 0.001$ ; NS; no significance.

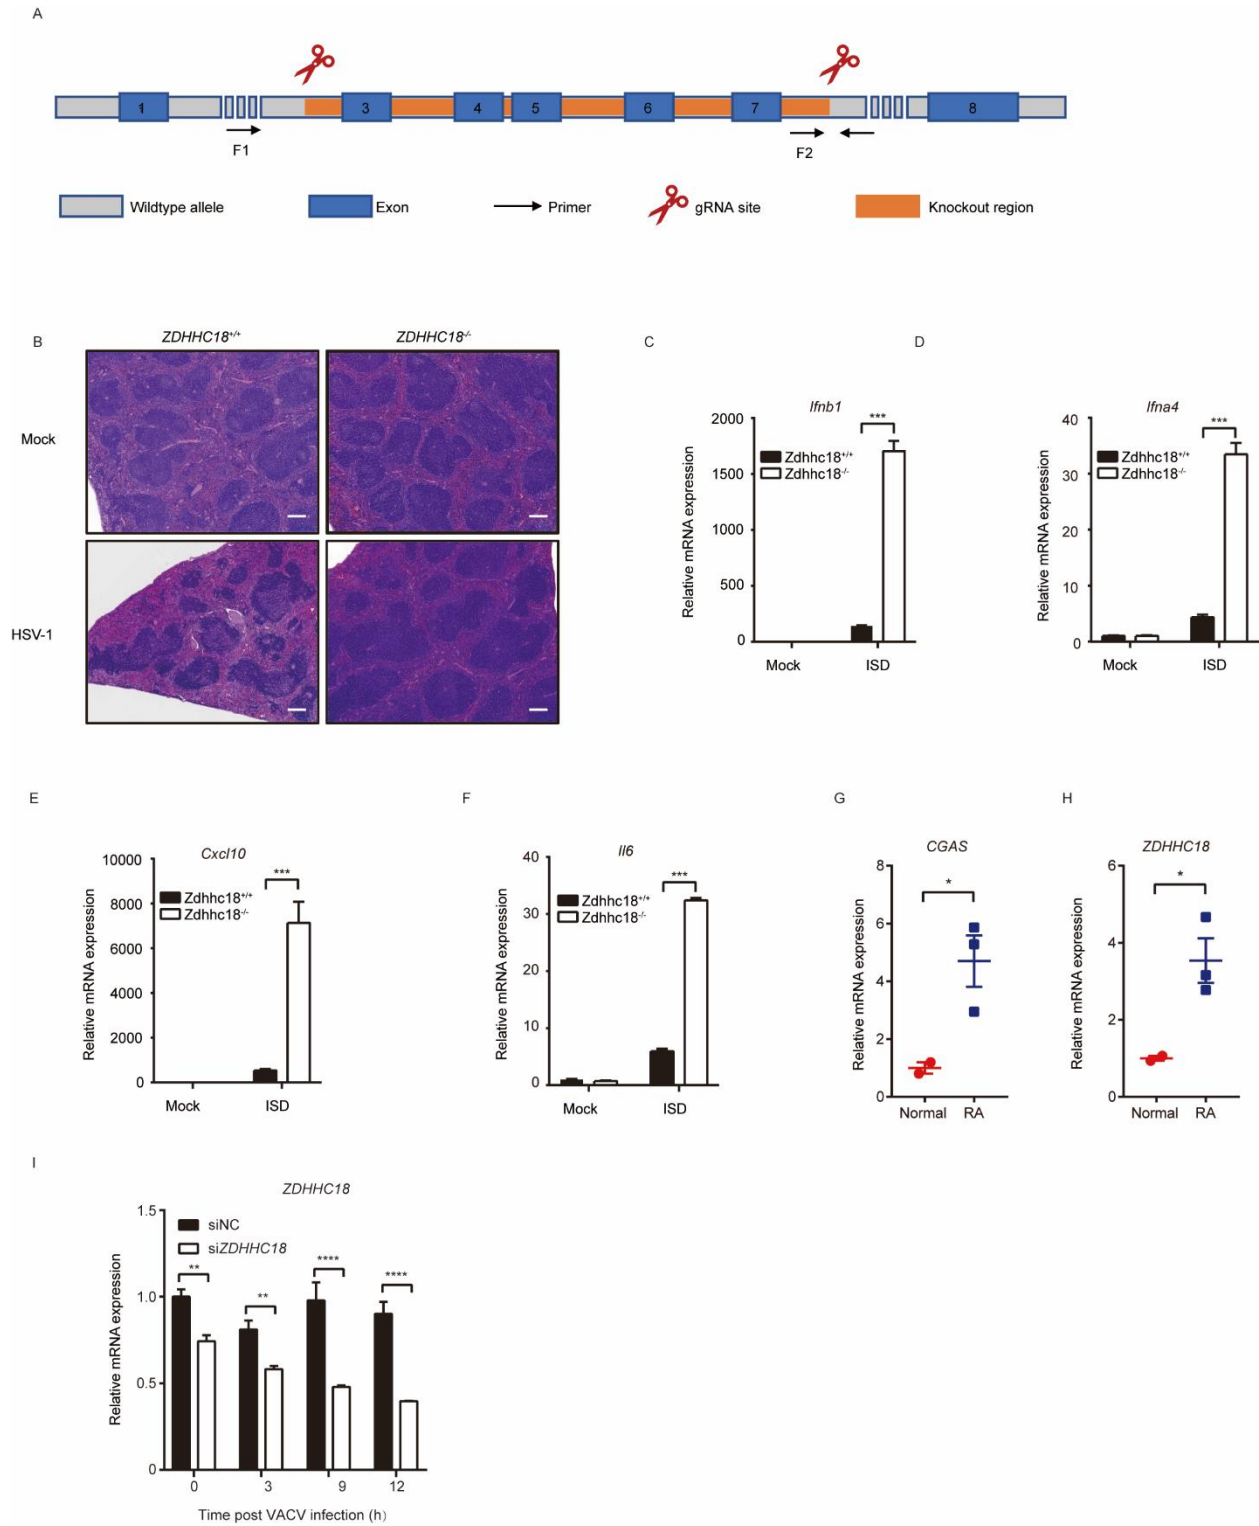

**Figure S6. *Zdhhc18* deficiency promotes antiviral activity against DNA viruses in mice.**

**(A)** Schematic presentation of the knockout strategy.

**(B)** Representative photomicrographs of spleen tissue H&E-stained sections from mice (*Zdhhc18*<sup>+/+</sup> or *Zdhhc18*<sup>-/-</sup>) intravenously injected with HSV-1-FS ( $5 \times 10^7$  PFU per mouse) or not after 2 days. PFU: plaque-forming units. H&E staining: hematoxylin-eosin staining. Scale bars: 200  $\mu$ m.

**(C-F)** BMDMs (*Zdhhc18*<sup>+/+</sup> or *Zdhhc18*<sup>-/-</sup>) were transfected with ISD (2  $\mu$ g/ml) for 8 h before RT-qPCR analysis for the expression of *Ifnb1* (C), *Ifna4* (D), *Cxcl10* (E) and *Il6* (F).

**(G-H)** PBMCs from two healthy people and three RA patients were analyzed by RT-qPCR for the expression of cGAS and ZDHHC18.

**(I)** PBMCs from healthy people were transfected with scrambled siRNA or ZDHHC18 siRNA (cocktail) for 48 h and then infected with VACV (1:200) for the indicated time before RT-qPCR analysis of ZDHHC18 expression.

Data information: Data are representative of at least two independent experiments; mean  $\pm$  SEM from triplicates of technical replicates, unpaired t test; nc: negative control; \*, P<0.05; \*\*, P<0.01; \*\*\*, P<0.001; \*\*\*\*, P<0.0001.

**Table S1. Materials.**

| REAGENT or RESOURCE                           | SOURCE                      | IDENTIFIER    |
|-----------------------------------------------|-----------------------------|---------------|
| Antibodies                                    |                             |               |
| cGAS (D3O8O) (mouse specific)                 | Cell Signaling Tech         | 31659S        |
| cGAS (D1D3G)                                  | Cell Signaling Tech         | 15102S        |
| ZDHHC18                                       | Abcam                       | ab154790      |
| STING/TMEM173                                 | Proteintech                 | 19851-1-AP    |
| p-STING (S365) (D8F4W)                        | Cell Signaling Tech         | 72971S        |
| IRF3 (D6I4C)                                  | Cell Signaling Tech         | 11904S        |
| p-IRF3 (S396) (4D4G)                          | Cell Signaling Tech         | 4947S         |
| p-I $\kappa$ B $\alpha$ (Ser32)               | Bioss                       | bsm-52169S    |
| Anti-Flag tag pAb                             | MBL                         | PM020         |
| Anti-Myc tag pAb                              | MBL                         | 562           |
| Anti-HA tag pAb                               | MBL                         | 561           |
| Rabbit IgG (DA1E) Isotype Control             | Cell Signaling Tech         | 3900S         |
| GAPDH (14C10)                                 | Cell Signaling Tech         | 2118S         |
| Calnexin                                      | Abcam                       | ab22595       |
| Rab7 (D95F2)                                  | Cell Signaling Tech         | 9367T         |
| EEA1 (C45B10)                                 | Cell Signaling Tech         | 3288T         |
| Alexa Fluor 488 goat anti-mouse IgG (H+L)     | Invitrogen                  | A11001        |
| Alexa Fluor 488 goat anti-rabbit IgG (H+L)    | Invitrogen                  | A11034        |
| Alexa Fluor 568 goat anti-mouse IgG (H+L)     | Invitrogen                  | A11031        |
| Alexa Fluor 568 goat anti-rabbit IgG (H+L)    | Invitrogen                  | A11011        |
| Bacterial and virus strains                   |                             |               |
| HSV-1                                         | Zhengfan Jiang's laboratory | N/A           |
| HSV-1 F strain                                | Zhengfan Jiang's laboratory | N/A           |
| GFP-HSV-1                                     | Zhengfan Jiang's laboratory | N/A           |
| Chemicals, peptides, and recombinant proteins |                             |               |
| Protease Inhibitor Cocktail                   | Thermo Fisher Scientific    | Cat#78430     |
| Phosphatase inhibitor                         | Thermo Fisher Scientific    | Cat#A32957    |
| HT-DNA                                        | Sigma                       | Cat#D6898     |
| Palmitic acid                                 | Sigma                       | Cat#P5585     |
| 2-Bromopalmitate                              | Sigma                       | Cat#238422    |
| NEM                                           | Sigma                       | Cat#04260     |
| Hydroxylamine                                 | Beyotime                    | Cat#ST093     |
| Palmostatin B                                 | Merck                       | Cat#178501    |
| NBD-palmitoyl-CoA                             | Avanti                      | Cat#810705    |
| IRDye 800 CW Azide Infrared Dye               | LI-COR                      | Cat#929-60000 |
| 17-ODYA                                       | Cayman                      | Cat#90270     |
| M-CSF, mouse                                  | Sigma                       | Cat#SRP3221   |
| PMA                                           | Sigma                       | Cat#P1585     |
| Anti-Myc Magnetic Beads                       | Bimake                      | Cat#B26301    |
| Anti-Flag M2 Magnetic Beads                   | Sigma                       | Cat#M8823     |
| Anti-Flag affinity gel                        | Bimake                      | Cat#B23102    |
| Passive lysis buffer                          | Promega                     | Cat#E194A     |

|                                                                                    |                                                      |              |
|------------------------------------------------------------------------------------|------------------------------------------------------|--------------|
| Luciferase Assay Reagent                                                           | Promega                                              | Cat#E1483    |
| TRIzol Reagent                                                                     | Invitrogen                                           | Cat#15596018 |
| Streptavidin Sepharose-R Beads                                                     | Cell Signaling Tech                                  | Cat#3419S    |
| Pierce RIPA Buffer                                                                 | Thermo Fisher Scientific                             | Cat#89900    |
| Protein A/G Plus-Agarose                                                           | Santa Cruz                                           | Cat#sc-2003  |
| cGAMP                                                                              | Sigma                                                | Cat#SML1299  |
| DAPI                                                                               | Beyotime                                             | Cat#C1006    |
| Fluoromount™ Aqueous Mounting Medium                                               | Sigma                                                | Cat#F4680    |
| Crystal Violet Staining Solution                                                   | Beyotime                                             | Cat#C0121    |
| Critical commercial assays                                                         |                                                      |              |
| Lipofectamine 3000 Transfection Kit                                                | Invitrogen                                           | Cat#2145954  |
| iScript cDNA synthesis kit                                                         | Bio-Rad                                              | Cat#1706691  |
| iTaq Universal SYBR Green Supermix                                                 | Bio-Rad                                              | Cat#172521   |
| Pierce BCA Protein Assay Kit                                                       | Thermo Fisher Scientific                             | Cat#23225    |
| Mouse IFN Beta ELISA Kit                                                           | Abcam                                                | Cat#252363   |
| Fast Mutagenesis System                                                            | Transgen                                             | Cat#FM111    |
| pEASY-Uni Seamless Cloning and Assembly Kit                                        | Transgen                                             | Cat#CU101    |
| SuperSignal™ West Pico PLUS Substrate Kit                                          | Thermo Fisher Scientific                             | Cat#34578    |
| 2'3'-cGAMP ELISA Kit                                                               | Cayman                                               | 501700       |
| Experimental models: Cell lines                                                    |                                                      |              |
| HEK293T                                                                            | ATCC                                                 | Cat#CRL-3216 |
| HeLa                                                                               | NICR (National Infrastructure of Cell Line Resource) | N/A          |
| RAW264.7                                                                           | NICR                                                 | N/A          |
| L929                                                                               | NICR                                                 | N/A          |
| Vero                                                                               | NICR                                                 | N/A          |
| THP-1                                                                              | NICR                                                 | N/A          |
| Experimental models: Organisms/strains                                             |                                                      |              |
| <i>Zdhhc18</i> <sup>-/-</sup> mice                                                 | Cyagen Biosciences                                   | N/A          |
| C57BL/6 mice                                                                       | Jackson Laboratory                                   | JAX: 000664  |
| Oligonucleotides                                                                   |                                                      |              |
| (FITC-, Biotin-) ISD (45 bp):<br>TACAGATCTACTAGTGATCTATGACTGATCTGTACAT<br>GATCTACA | This paper                                           | N/A          |
| siRNA targeting sequence: ZDHHC18 #1:<br>CCGGCCUCUUCUUCGUCUU                       | This paper                                           | N/A          |
| siRNA targeting sequence: ZDHHC18 #2:<br>GCGCUCAGGGAAGCAACUU                       | This paper                                           | N/A          |
| siRNA targeting sequence: ZDHHC18 #3:<br>CCAAGCCUGAUGCCAGCAU                       | This paper                                           | N/A          |
| Scrambled (control): UUCUCCGAACGUGUCACGU                                           | This paper                                           | N/A          |
| Recombinant DNA                                                                    |                                                      |              |
| IFN-Beta pGL3                                                                      | Addgene                                              | #102597      |
| pCMV3-IRF3-Flag                                                                    | Sino Biological                                      | #HG12007-CF  |
| pCMV-3Tag (Flag)                                                                   | Agilent Technologies                                 | #240195      |
| pCMV-3Tag (Myc)                                                                    | Agilent Technologies                                 | #240196      |
| pLKO.1                                                                             | Addgene                                              | #10878       |
| pMD2.G                                                                             | Addgene                                              | #12259       |

|                            |                                                                                                               |        |
|----------------------------|---------------------------------------------------------------------------------------------------------------|--------|
| psPAX2                     | Addgene                                                                                                       | #12260 |
| pEF-TBK1-Flag              | Dr. Zhengfan Jiang                                                                                            | N/A    |
| pET28b-His-sumo-cGAS       | Dr. Conggang Zhang                                                                                            | N/A    |
| pTY-EGFP-cGAS              | Dr. Conggang Zhang                                                                                            | N/A    |
| pEF-HA-cGAS                | This manuscript                                                                                               | N/A    |
| pCMV-Flag-cGAS             | This manuscript                                                                                               | N/A    |
| pCDNA3.1-STING-Flag        | This manuscript                                                                                               | N/A    |
| pCMV-Myc-cGAS              | This manuscript                                                                                               | N/A    |
| pCMV-Flag-ZDHHC18          | This manuscript                                                                                               | N/A    |
| pCMV-Myc-ZDHHC18           | This manuscript                                                                                               | N/A    |
| pCMV-HA-ZDHHC18            | This manuscript                                                                                               | N/A    |
| pCMV-Myc-ZDHHC18 (CS)      | This manuscript                                                                                               | N/A    |
| pCMV-Flag-cGAS (1-160)     | This manuscript                                                                                               | N/A    |
| pCMV-Flag-cGAS (161-522)   | This manuscript                                                                                               | N/A    |
| pCMV-Flag-ZDHHC18 (M)      | This manuscript                                                                                               | N/A    |
| pCMV-Flag-ZDHHC18 (deltaM) | This manuscript                                                                                               | N/A    |
| pLKO.1-shZDHHC2            | This manuscript                                                                                               | N/A    |
| pLKO.1-shZDHHC3            | This manuscript                                                                                               | N/A    |
| pLKO.1-shZDHHC4            | This manuscript                                                                                               | N/A    |
| pLKO.1-shZDHHC5            | This manuscript                                                                                               | N/A    |
| pLKO.1-shZDHHC6            | This manuscript                                                                                               | N/A    |
| pLKO.1-shZDHHC7            | This manuscript                                                                                               | N/A    |
| pLKO.1-shZDHHC8            | This manuscript                                                                                               | N/A    |
| pLKO.1-shZDHHC9            | This manuscript                                                                                               | N/A    |
| pLKO.1-shZDHHC12           | This manuscript                                                                                               | N/A    |
| pLKO.1-shZDHHC13           | This manuscript                                                                                               | N/A    |
| pLKO.1-shZDHHC16           | This manuscript                                                                                               | N/A    |
| pLKO.1-shZDHHC17           | This manuscript                                                                                               | N/A    |
| pLKO.1-shZDHHC18           | This manuscript                                                                                               | N/A    |
| pLKO.1-shZDHHC20           | This manuscript                                                                                               | N/A    |
| pLKO.1-shmZDHHC18          | This manuscript                                                                                               | N/A    |
| Software and algorithms    |                                                                                                               |        |
| GraphPad Prism 7           | <a href="https://www.graphpad.com/">https://www.graphpad.com/</a>                                             | N/A    |
| Adobe Illustrator CC       | <a href="https://www.adobe.com/products/illustrator.html">https://www.adobe.com/products/illustrator.html</a> | N/A    |
| NIS-Elements Viewer 5.21   | <a href="https://www.microscope.healthcare.nikon.com">https://www.microscope.healthcare.nikon.com</a>         | N/A    |
| ImageJ 1.53c               | <a href="https://imagej.nih.gov">https://imagej.nih.gov</a>                                                   | N/A    |
| PyMOL 2.2.0                | <a href="https://pymol.org">https://pymol.org</a>                                                             | N/A    |
| Imaris 9.6.0               | <a href="https://www.oxinst.com">Imaris.oxinst.com</a>                                                        | N/A    |
| CaseViewer 2.2             | <a href="https://www.3dhistech.com">https://www.3dhistech.com</a>                                             | N/A    |



**Table S2. Target sequences of shRNAs.**

| shRNA         | Sequences (5' to 3')                                              |
|---------------|-------------------------------------------------------------------|
| hZDHHc2-sh-F  | CCGGGTATGAGCAATCCTGCATTAACCTCGAGTTAATGCAGGATTGCTCATACTT<br>TTTTG  |
| hZDHHc2-sh-R  | AATTCAAAAAAGTATGAGCAATCCTGCATTAACCTCGAGTTAATGCAGGATTGCT<br>CATACT |
| hZDHHc3-sh-F  | CCGGCCAGAAGTACTTCGTCCTGTTCTCGAGAACAGGACGAAGTACTTCTGGTT<br>TTTTG   |
| hZDHHc3-sh-R  | AATTCAAAAAACCAGAAGTACTTCGTCCTGTTCTCGAGAACAGGACGAAGTACT<br>TCTGGT  |
| hZDHHc4-sh-F  | CCGGGAGGTGCTCTACTTGTGATTTCTCGAGAAATCACAAGTAGAGCACCTCTT<br>TTTG    |
| hZDHHc4-sh-R  | AATTCAAAAAAGAGGTGCTCTACTTGTGATTTCTCGAGAAATCACAAGTAGAGCA<br>CCTC   |
| hZDHHc5-sh-F  | CCGGCGATGTCTTACAGCAGCCAAACTCGAGTTTGGCTGCTGTAAGACATCGTT<br>TTTTG   |
| hZDHHc5-sh-R  | AATTCAAAAAACGATGTCTTACAGCAGCCAAACTCGAGTTTGGCTGCTGTAAGA<br>CATCG   |
| hZDHHc6-sh-F  | CCGGGGTTTACGATACTGGTTATATCTCGAGATATAACCAGTATCGTAAACCTT<br>TTTTG   |
| hZDHHc6-sh-R  | AATTcAAAAAAGGTTTACGATACTGGTTATATCTCGAGATATAACCAGTATCGTAA<br>ACC   |
| hZDHHc7-sh-F  | CCGGACTGCCCGTGGGTGAACAATTCTCGAGAATTGTTCAACCCACGGGCAGTTT<br>TTTTG  |
| hZDHHc7-sh-R  | AATTcAAAAAACTGCCCGTGGGTGAACAATTCTCGAGAATTGTTCAACCCACGGG<br>CAGT   |
| hZDHHc8-sh-F  | CCGGCACCTGCCATGTACAAGTTTACTCGAGTAAACTTGTACATGGCAGGTGTT<br>TTTTG   |
| hZDHHc8-sh-R  | AATTcAAAAAACACCTGCCATGTACAAGTTTACTCGAGTAAACTTGTACATGGCA<br>GGTG   |
| hZDHHc9-sh-F  | CCGGGAGGAACTACCGCTACTTCTACTCGAGTAGAAGTAGCGGTAGTTCCTCTT<br>TTTTG   |
| hZDHHc9-sh-R  | AATTcAAAAAAGAGGAACTACCGCTACTTCTACTCGAGTAGAAGTAGCGGTAGT<br>TCCTC   |
| hZDHHc12-sh-F | CCGGATGGACCCTGGCTACGTGAATCTCGAGATTCACGTAGCCAGGGTCCATT<br>TTTTG    |
| hZDHHc12-sh-R | AATTcAAAAAATGGACCCTGGCTACGTGAATCTCGAGATTCACGTAGCCAGGGT<br>CCAT    |
| hZDHHc13-sh-F | CCGGCTCATGTTATCAGCTCACAAACTCGAGTTTGTGAGCTGATAACATGAGTT<br>TTTTG   |
| hZDHHc13-sh-R | AATTcAAAAAACTCATGTTATCAGCTCACAAACTCGAGTTTGTGAGCTGATAACA<br>TGAG   |
| hZDHHc16-sh-F | CCGGGAAAGACACAATGTGGAGAAACTCGAGTTTCTCCACATTGTGTCTTTCTT<br>TTTTG   |
| hZDHHc16-sh-R | AATTcAAAAAAGAAAGACACAATGTGGAGAAACTCGAGTTTCTCCACATTGTGT<br>CTTTT   |
| hZDHHc17-sh-F | CCGGGCAGGGAATACCACAGTCATTCTCGAGAATGACTGTGGTATTCCCTGCTT<br>TTTTG   |
| hZDHHc17-sh-R | AATTcAAAAAAGCAGGGAATACCACAGTCATTCTCGAGAATGACTGTGGTATTCC<br>CCTGC  |
| hZDHHc18-sh-F | CCGGGTTTATTCTCTCCCTCTCATTCTCGAGAATGAGAGGGAGAGAATAAACTT<br>TTTTG   |

|                           |                                                                          |
|---------------------------|--------------------------------------------------------------------------|
| <b>hZDHHc18<br/>-sh-R</b> | <b>AATTcAAAAAAGTTTATTCTCTCCCTCTCATTCTCGAGAATGAGAGGGAGAGAAT<br/>AAAC</b>  |
| <b>hZDHHc20<br/>-sh-F</b> | <b>CCGGGAAGTGGCTCAAATCAACCTTCTCGAGAAGGTTGATTTGAGCCACTTCTT<br/>TTTTG</b>  |
| <b>hZDHHc20<br/>-sh-R</b> | <b>AATTcAAAAAAGAAGTGGCTCAAATCAACCTTCTCGAGAAGGTTGATTTGAGCC<br/>ACTTC</b>  |
| <b>mZDHHc1<br/>8-sh-F</b> | <b>CCGGCCTGACAACCTAACGAAGATATCTCGAGATATCTTCGTTAGTTGTCAGGTT<br/>TTTTG</b> |
| <b>mZDHHc1<br/>8-sh-R</b> | <b>aattcaaaaaCCTGACAACCTAACGAAGATATCTCGAGATATCTTCGTTAGTTGTCAGG</b>       |

**Table S3. Primers for Quantitative PCR.**

| qPCR Primers        | Sequences (5' to 3')      |
|---------------------|---------------------------|
| <i>GAPDH-F</i>      | ATGACATCAAGAAGGTGGTG      |
| <i>GAPDH-R</i>      | CATACCAGGAAATGAGCTTG      |
| <i>ZDHHC18-F</i>    | ACCGGCCTCTTCTTCGTCT       |
| <i>ZDHHC18-R</i>    | AACTGCCTGTGTTGTCGATCT     |
| <i>cGAS-F</i>       | AAGAAGGCCTGCGCATTCAA      |
| <i>cGAS-R</i>       | CCGCCATGTTTCTTCTTGGA      |
| <i>IFN-β-F</i>      | CATTACCTGAAGGCCAAGGA      |
| <i>IFN-β-R</i>      | CAATTGTCCAGTCCCAGAGG      |
| <i>CXCL10-F</i>     | TGGCATTCAAGGAGTACCTC      |
| <i>CXCL10-R</i>     | TTGTAGCAATGATCTCAACACG    |
| <i>HSV-1 UL30-F</i> | CATCACCAGCCGGAGAGGGAC     |
| <i>HSV-1 UL30-R</i> | GGGCCAGGCGCTTGTGGTGTA     |
| <i>mActin-F</i>     | TGACGTTGACATCCGTAAAGACC   |
| <i>mActin-R</i>     | AAGGGTGTAACACGCAGCTCA     |
| <i>mZD18-F</i>      | TCAACGGGCAGACAGTGAAAC     |
| <i>mZD18-R</i>      | GAAGCGGTAGTTCCTCTCC       |
| <i>mCgas-F</i>      | ACCGGACAAGCTAAAGAAGGTGCT  |
| <i>mCgas-R</i>      | GCAGCAGGCGTCCACAACCTTAT   |
| <i>mIfn-β-F</i>     | ATGGTGGTCCGAGCAGAGAT      |
| <i>mIfn-β-R</i>     | CCACCACTCATTCTGAGGCA      |
| <i>mIfn-α4-F</i>    | ACCCACAGCCCAGAGAGTGACC    |
| <i>mIfn-α4-R</i>    | AGGCCCTCTTGTTCCTGAGGT     |
| <i>mIl6-F</i>       | GAGGATACTCCCAACAGACC      |
| <i>mIl6-R</i>       | AAGTGCATCATCGTTGTTTCATACA |
| <i>mCxcl10-F</i>    | GCCGTCATTTTCTGCCTCA       |
| <i>mCxcl10-R</i>    | CGTCCTTGCGAGAGGGATC       |
| <i>mCcl5-F</i>      | GACACCACTCCCTGCTGCTT      |
| <i>mCcl5-R</i>      | ACACTTGGCGGTTTCCTTCG      |
| <i>ZDHHC2-F</i>     | AACACTGGCGAACAAGTTGTG     |
| <i>ZDHHC2-R</i>     | AGATGGGAAGATCCTTGGCTG     |
| <i>ZDHHC3-F</i>     | CCACTCCGAAACATTGAGCG      |
| <i>ZDHHC3-R</i>     | CCACAGCCGTCACGGATAAA      |
| <i>ZDHHC4-F</i>     | TGATGGGTCTTGTCTTATCTGC    |
| <i>ZDHHC4-R</i>     | AGGTGTGGTTTCTCGTATGGAA    |
| <i>ZDHHC5-F</i>     | CACCTGCCGCTTTTACCGT       |
| <i>ZDHHC5-R</i>     | CGGCGACCAATACAGTTATTCAC   |
| <i>ZDHHC6-F</i>     | ATGGGTACGTTCTGTTCCGTT     |
| <i>ZDHHC6-R</i>     | AAGGGCCAATACCACAACACA     |
| <i>ZDHHC7-F</i>     | CTGACCGGGTCTGGTTCATC      |

|                  |                         |
|------------------|-------------------------|
| <i>ZDHHC7-R</i>  | CATGACGAAAGTCACCACGAA   |
| <i>ZDHHC8-F</i>  | CTGTTCCCGTCTACAATGGCA   |
| <i>ZDHHC8-R</i>  | GACCTGGATACCTCGCACAT    |
| <i>ZDHHC9-F</i>  | CCCAGGCAGGAACACCTTTT    |
| <i>ZDHHC9-R</i>  | CCGAGGAATCACTCCAGGG     |
| <i>ZDHHC12-F</i> | GTGCTGACCTGGGGAATCAC    |
| <i>ZDHHC12-R</i> | CTGCACATTCACGTAGCCA     |
| <i>ZDHHC13-F</i> | ACCCCACTCTTATTGATGGAGA  |
| <i>ZDHHC13-R</i> | TGTCTGCCCATTTACATCTGTC  |
| <i>ZDHHC16-F</i> | ACTCCGGGGTCTAGTACAGC    |
| <i>ZDHHC16-R</i> | CCAGCGGATCACGTTGTCT     |
| <i>ZDHHC17-F</i> | TGAACCTCTTGGACGGAAAAC   |
| <i>ZDHHC17-R</i> | TGCTTCCACCAATTCTCGACA   |
| <i>ZDHHC20-F</i> | TTCGTGGTTCGTCTGGTCCTA   |
| <i>ZDHHC20-R</i> | AGGTAAACAACGGTCTTTCCATT |
