# Supplementary material
Source: PubMed Central journal article supplement (PMC9156970)

Figure 4D

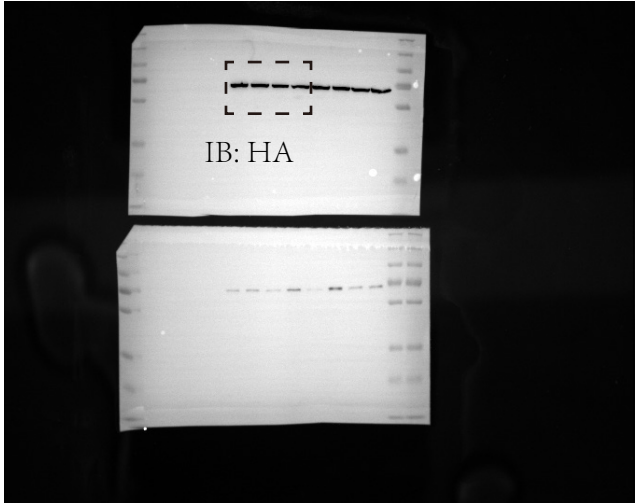

Figure 4D

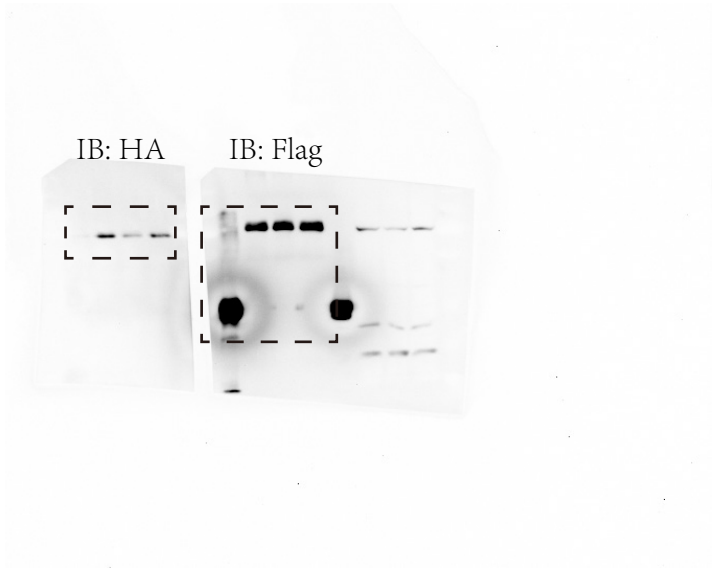

Figure 4D

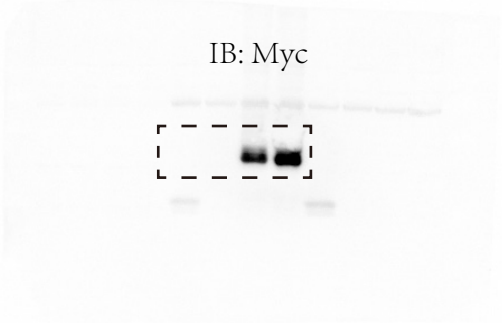

Figure 4E

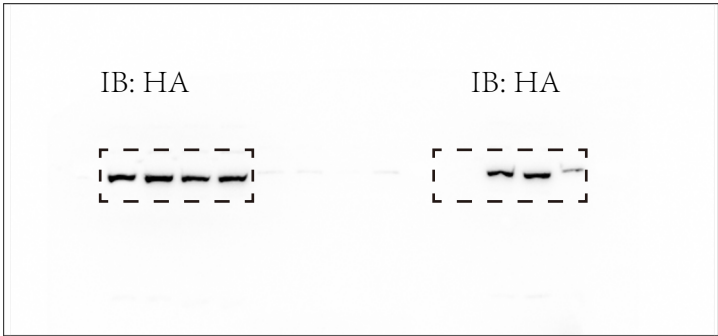

Figure 4E

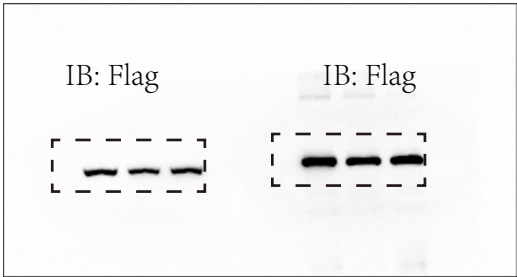

Supplement: EMBJ-41-e109272-s001.pdf [file EMBJ-41-e109272-s001.pdf]

Figure 2C

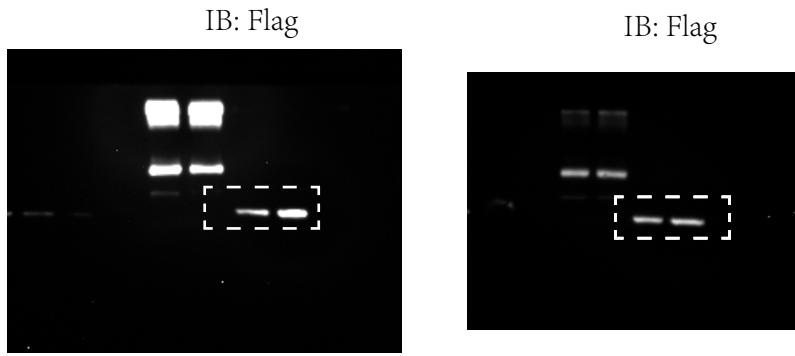

Figure 2E

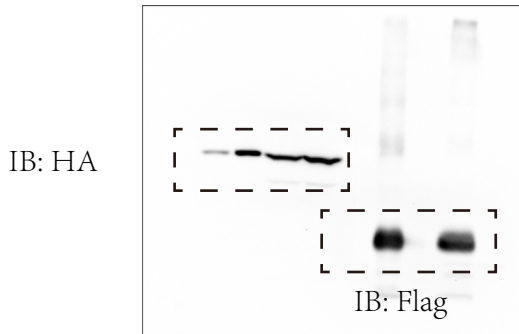

Figure 2F

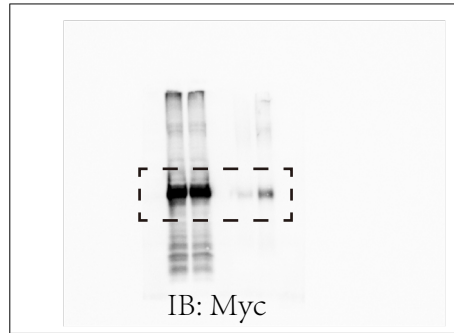

Figure 2F

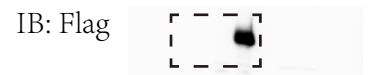

Figure 2F

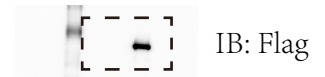

Figure 2H

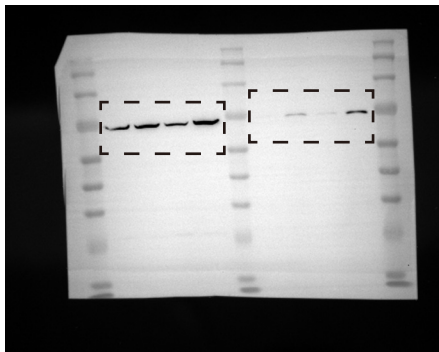

Figure 2H

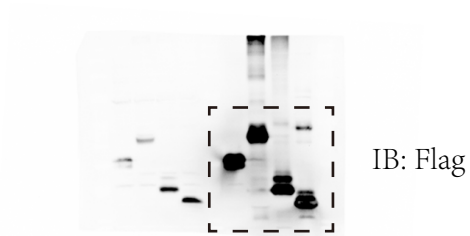

Figure 2J

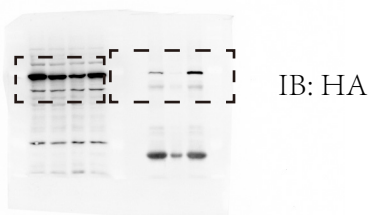

Figure 2J

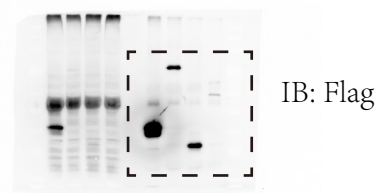

Supplement: EMBJ-41-e109272-s003.pdf [file EMBJ-41-e109272-s003.pdf]

Figure S3L

IB: HA IB: HA

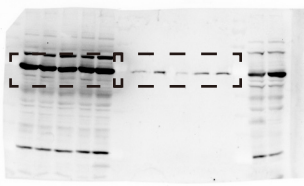

Figure S3L

IB: Flag

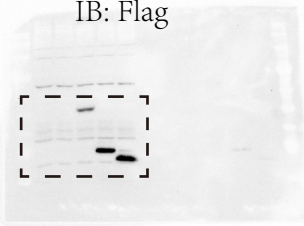

Supplement: EMBJ-41-e109272-s005.pdf [file EMBJ-41-e109272-s005.pdf]

Figure 3F

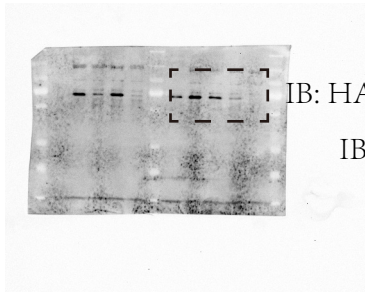

Figure 3F

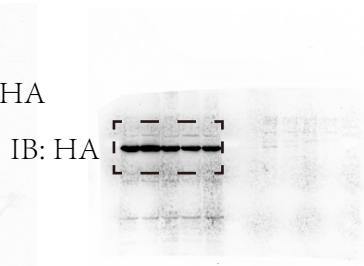

Figure 3F

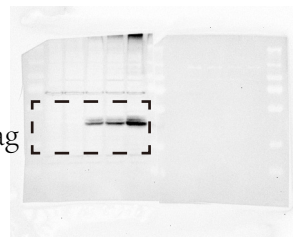

Figure 3G

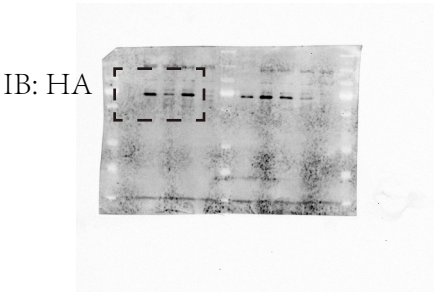

Figure 3G

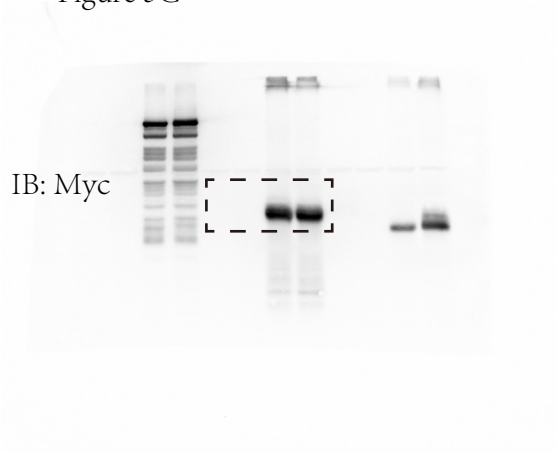

Figure 3G

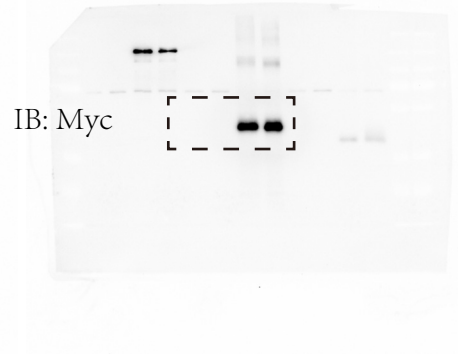

Figure 3G

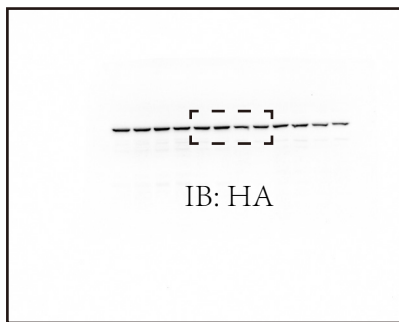

Supplement: EMBJ-41-e109272-s008.pdf [file EMBJ-41-e109272-s008.pdf]

Figure 1B

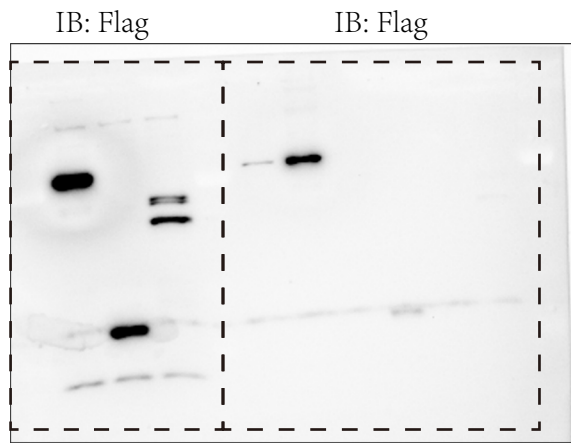

Figure 1C

Fluorescence

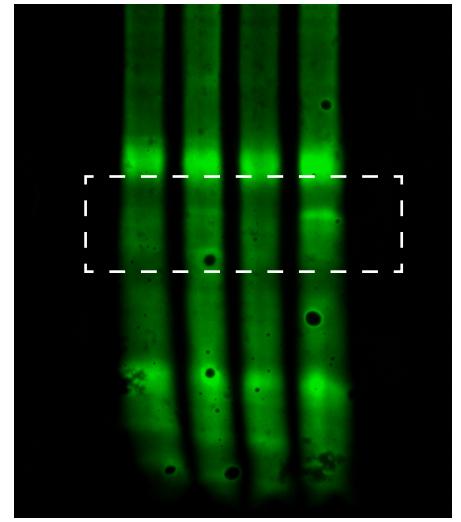

Figure 1O

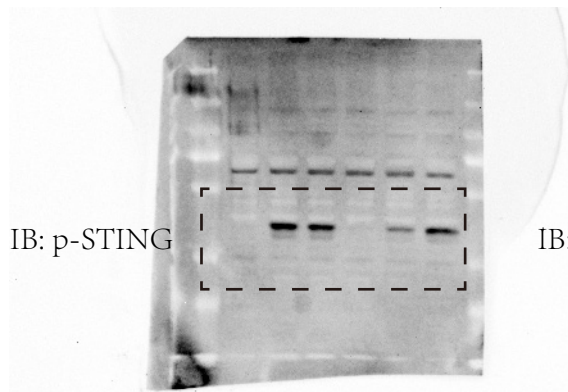

Figure 1O

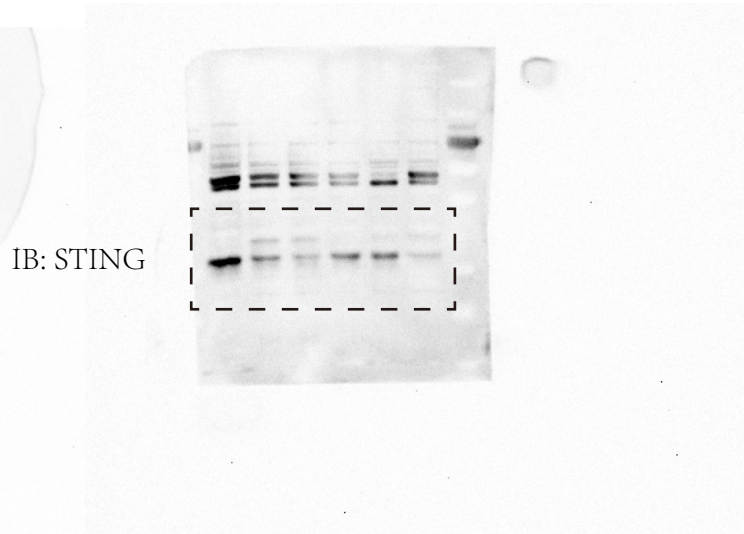

Figure 1O

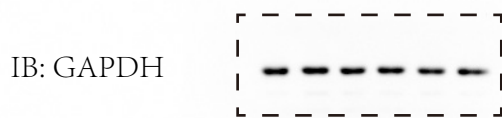

Supplement: EMBJ-41-e109272-s009.pdf [file EMBJ-41-e109272-s009.pdf]
